# Supplementary material for: Highly sensitive colorimetric detection and effective adsorption of phosphate based on MOF-808(Zr/Ce)
Source: Royal Society of Chemistry journal article supplement (doi:10.1039/d2nj00640e), 2022-01-01
Supplement: d2nj00640e1.pdf [file d2nj00640e1.pdf]

## Supplementary Information

### Highly sensitive colorimetric detection and effective adsorption of phosphate based on MOF-808(Zr/Ce)

Yuzhu Zhai<sup>a,b</sup>, Yijing Li<sup>a,b\*</sup>, Qin Hou<sup>a,b</sup>, Yuanhong Zhang<sup>a,b</sup>, Enlong Zhou<sup>a,b</sup>, Houshen Li<sup>a,b\*</sup>, and Shiyun Ai<sup>a,b</sup>

<sup>a</sup> College of Chemistry and Material Science, Shandong Agricultural University, Taian, Shandong, 271018, PR China.

<sup>b</sup> Key Laboratory of Agricultural Film Application of Ministry of Agriculture and Rural Affairs, Taian, Shandong 271018, PR China.

\* Corresponding authors.

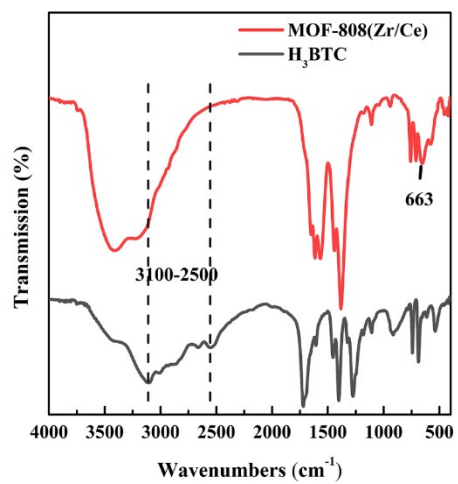

**Fig. S1** FTIR spectra of H<sub>3</sub>BTC and MOF-808(Zr/Ce).

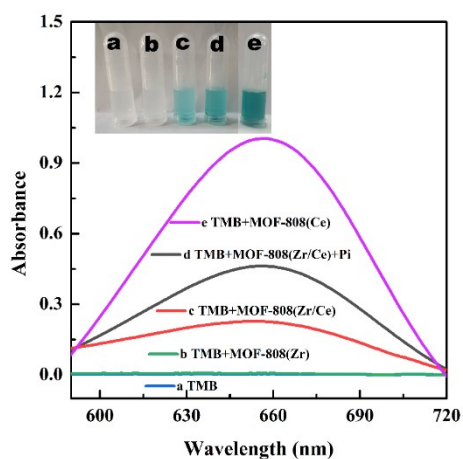

**Fig. S2** UV-vis spectra of (a) TMB solution, (b) TMB + MOF-808(Zr) solution, (c) TMB + MOF-808(Zr/Ce) solution, (d) TMB + MOF-808(Zr/Ce) solution + phosphate solution, (e) TMB + MOF-808(Ce) solution. (Reaction conditions: TMB concentration: 186  $\mu\text{M}$ ; catalyst: 279  $\text{mg mL}^{-1}$ ; incubation time: 10 min).

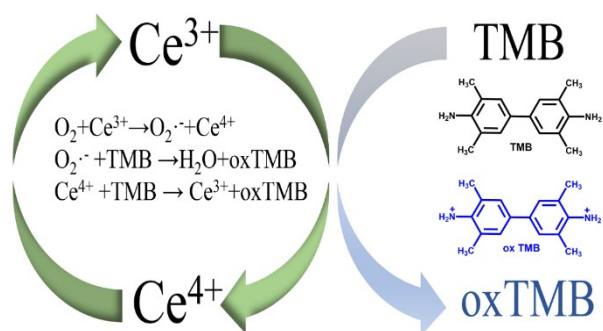

**Fig. S3** The underlying process for MOF-808(Zr/Ce) catalyze oxidize TMB reaction.

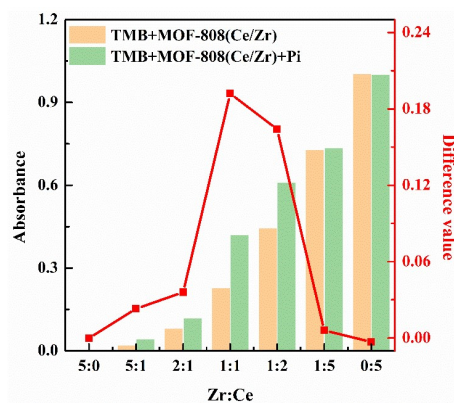

**Fig. S4** Effect of the ratio of  $Zr^{4+}/Ce^{4+}$  for phosphate detection. The left Y-axis represent  $A_{654}$  of the mixture in the absence and presence of phosphate The right Y-axis represent  $A_{pi}-A_0$  ( $A_{pi}$ :  $A_{654}$  in the presence of phosphate;  $A_0$ :  $A_{654}$  in the absence of phosphate.).

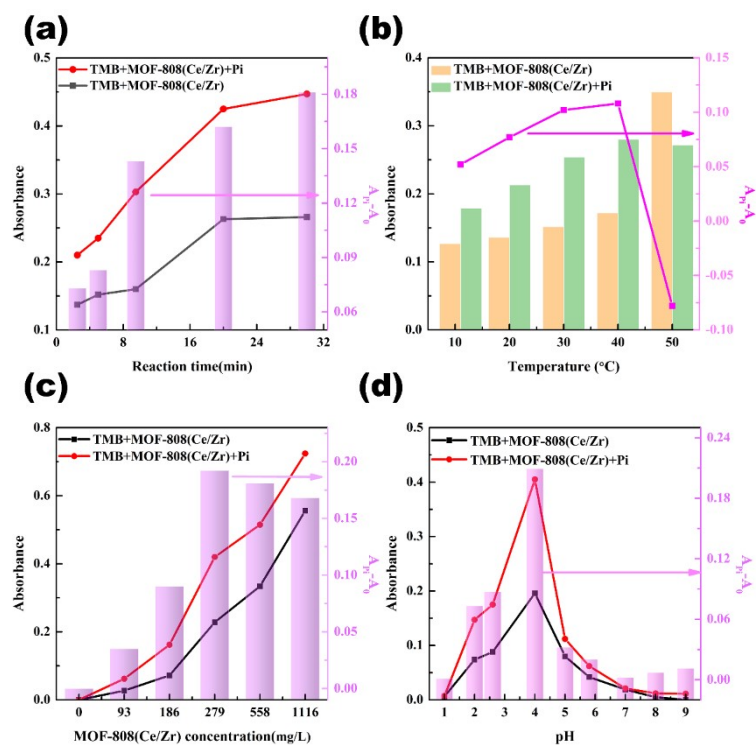

**Fig. S5** Effect of (a) reaction time, (b) incubate temperature, (c) catalysts concentration, and (d) pH for Pi detection. The left Y-axis represent  $A_{654}$  of the mixture in the absence and presence of Pi. The right Y-axis represent  $A_{\text{pi}} - A_0$  ( $A_{\text{pi}}$ :  $A_{654}$  in the presence of Pi;  $A_0$ :  $A_{654}$  in the absence of Pi.). Reaction conditions: concentration of TMB is 186  $\mu\text{M}$ .

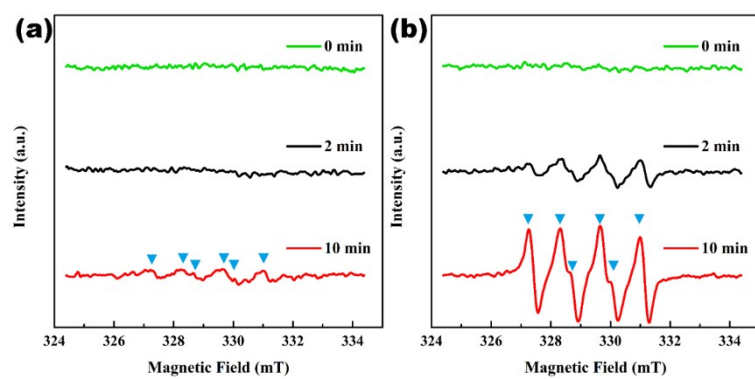

**Fig. S6** EPR spectra of MOF-808(Zr/Ce) (a) in the absence and (b) in the presence of phosphate.

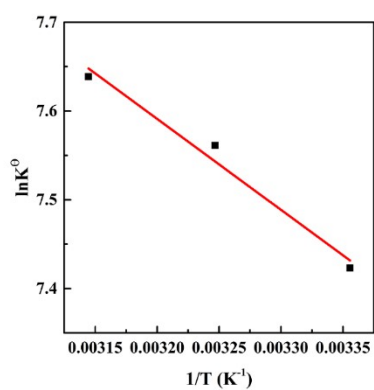

**Fig. S7** Phosphate adsorption plot of  $\ln K^{\theta}$  versus  $1/T$  for estimation of thermodynamic parameters.



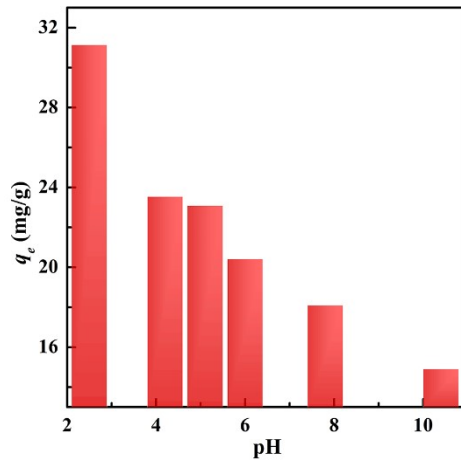

**Fig. S8** Effects of the pH on phosphate adsorption of MOF-808(Zr/Ce). The initial pH value is 2.5, 4.2, 6, 7.8, and 10.4. The pH value is 5.1 when the concentration of Pi is 50 mg L<sup>-1</sup>.

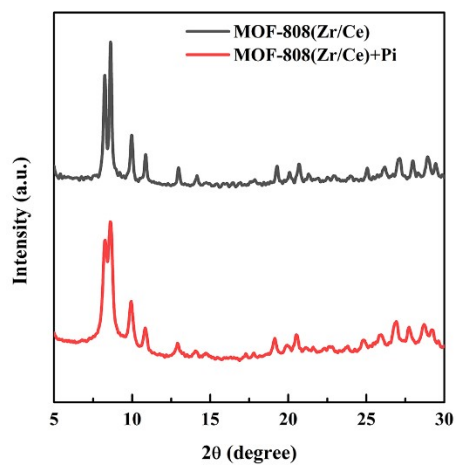

**Fig. S9** XRD spectra of MOF-808(Zr/Ce) and MOF-808(Zr/Ce) +Pi.

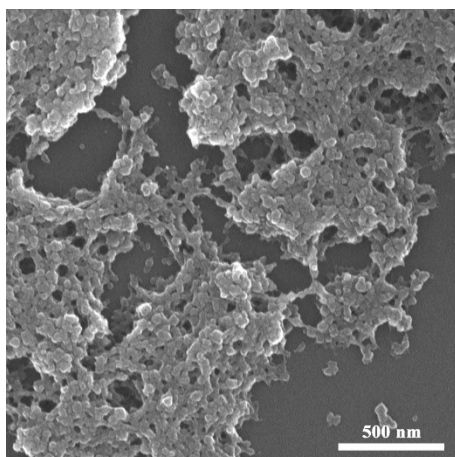

**Fig. S10** SEM image of MOF-808(Zr/Ce) after phosphate adsorption.

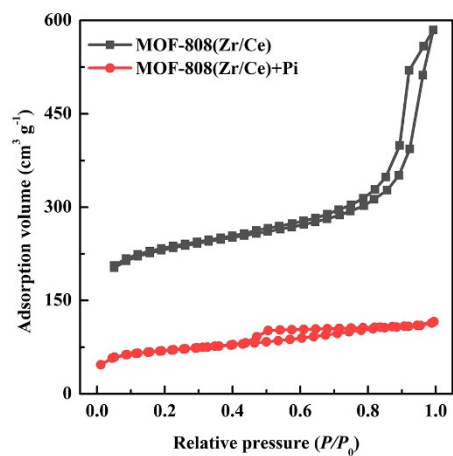

**Fig. S11** BET isotherms of MOF-808(Zr/Ce) before and after phosphate adsorption.

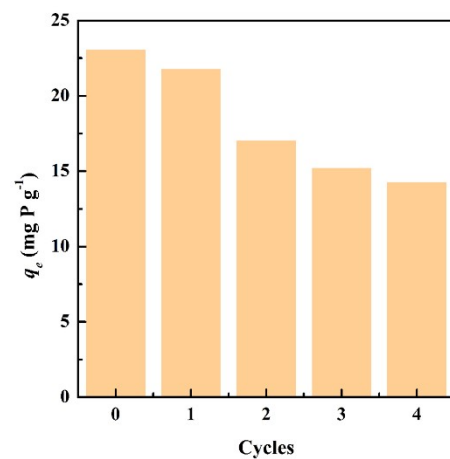

**Fig. S12** Reusability of MOF-808(Zr/Ce) for P (50 mg·L<sup>-1</sup>, 10 h) adsorption from water after NaOH washing.

**Table S1** EDS elemental analysis of MOF-808(Zr/Ce).

| Element | Atomic % |       |       | Mean % |
|---------|----------|-------|-------|--------|
|         | 1        | 2     | 3     |        |
| C       | 41.49    | 47.35 | 45.83 | 44.89  |
| O       | 43.47    | 41.11 | 41.22 | 41.93  |
| Zr      | 8.48     | 6.33  | 7.02  | 7.28   |
| Ce      | 6.56     | 5.22  | 5.92  | 5.90   |

**Table S2** List of phosphate detection performance by different material and method.

| Material                                   | Method          | Linear range<br>( $\mu\text{M}$ ) | LOD<br>( $\mu\text{M}$ ) | Ref.         |
|--------------------------------------------|-----------------|-----------------------------------|--------------------------|--------------|
| MS-Ag nanoplates                           | Colorimetric    | 6.1-183                           | 2                        | 1            |
| Eu/Ce UiO-66-(COOH) <sub>2</sub>           | Fluorescent     | 0.3-20                            | 0.247                    | 2            |
| Mn-ZnS-QDs/Ce <sup>3+</sup><br>nanohybrids | Fluorescent     | 8-320                             | 2.71                     | 3            |
| Au NPs-CTAB                                | Luminescence    | 11.7-750                          | 3.8                      | 4            |
| Reagentless paper-based                    | Electrochemical | Up to 300                         | 4                        | 5            |
| Oxidized UiO-66(Ce/Zr)                     | Colorimetric    | 33.3-666.7                        | 11.1                     | 6            |
| MOF-808(Zr/Ce)                             | Colorimetric    | 11-581                            | 3.7                      | This<br>work |

**Table S3** Kinetic model parameters of MOF-808(Zr/Ce) for phosphate adsorption.

| Kinetic models parameters                           |         |
|-----------------------------------------------------|---------|
| Pseudofirst-order kinetic                           |         |
| $q_e$ (mg g <sup>-1</sup> )                         | 14.9    |
| $k_1$ (min <sup>-1</sup> )                          | 0.0089  |
| R <sup>2</sup>                                      | 0.974   |
| Pseudosecond-order kinetic                          |         |
| $q_e$ (mg g <sup>-1</sup> )                         | 23.7    |
| $k_2$ (g mg <sup>-1</sup> min <sup>-1</sup> )       | 0.0017  |
| R <sup>2</sup>                                      | 0.9990  |
| Intraparticle diffusion kinetic                     |         |
| $k_{p,1}$ (g mg <sup>-1</sup> min <sup>-1/2</sup> ) | 1.70333 |
| R <sup>2</sup>                                      | 0.95966 |
| $k_{p,2}$ (g mg <sup>-1</sup> min <sup>-1/2</sup> ) | 0.56232 |
| R <sup>2</sup>                                      | 0.94611 |
| $k_{p,3}$ (g mg <sup>-1</sup> min <sup>-1/2</sup> ) | 0.00888 |
| R <sup>2</sup>                                      | 0.67726 |



**Table S4** Parameters of isotherm models of MOF-808(Zr/Ce) for phosphate adsorption.

| Isotherm models parameters                                            | 298 K   | 308 K   | 318 K   |
|-----------------------------------------------------------------------|---------|---------|---------|
| Langmuir                                                              | 298 K   | 308 K   | 318 K   |
| $q_m$ (mg g <sup>-1</sup> )                                           | 54.9    | 65.1    | 68.5    |
| $K_L$ (L mg <sup>-1</sup> )                                           | 0.054   | 0.062   | 0.070   |
| R <sup>2</sup>                                                        | 0.97966 | 0.98239 | 0.98202 |
| Freundlich                                                            | 298 K   | 308 K   | 318 K   |
| $K_F$ ((mg·g <sup>-1</sup> ) · (L mg <sup>-1</sup> ) <sup>1/n</sup> ) | 9.60    | 11.42   | 13.28   |
| 1/n                                                                   | 0.35    | 0.36    | 0.34    |
| R <sup>2</sup>                                                        | 0.95616 | 0.96441 | 0.97442 |
| Temkin                                                                | 298 K   | 308 K   | 318 K   |
| $B_T$                                                                 | 10.21   | 12.18   | 11.88   |
| $K_T$ (L mg <sup>-1</sup> )                                           | 0.89    | 1.03    | 1.43    |
| $b_T$ (J mol <sup>-1</sup> )                                          | 242.68  | 211.25  | 222.56  |
| R <sup>2</sup>                                                        | 0.91992 | 0.92963 | 0.92836 |

**Table S5** Thermodynamic parameters of phosphate adsorption onto MOF-808(Zr/Ce).

| $T$ (K) | $K^\ominus$ | $\Delta G^\ominus$ (kJ mol <sup>-1</sup> ) | $\Delta H^\ominus$ (kJ mol <sup>-1</sup> ) | $\Delta S^\ominus$ (J mol <sup>-1</sup> ·K <sup>-1</sup> ) |
|---------|-------------|--------------------------------------------|--------------------------------------------|------------------------------------------------------------|
| 298     | 1674        | -9.91                                      |                                            |                                                            |
| 308     | 1922        | -10.52                                     | 8.52                                       | 61.83                                                      |
| 318     | 2077        | -11.14                                     |                                            |                                                            |

**Table S6** Adsorption capacity of phosphate on MOF-808(Zr/Ce) and other adsorbents.

| Adsorbent                                                    | $q_e$ (mg P g <sup>-1</sup> ) | pH  | Temperature (°C) | Reference |
|--------------------------------------------------------------|-------------------------------|-----|------------------|-----------|
| Fe <sub>3</sub> O <sub>4</sub> /lignin bio-activated carbons | 21.18                         | 7   | 25               | [7]       |
| La/Fe <sub>3</sub> O <sub>4</sub> -BC                        | 10.82                         | 6.5 | 25               | [8]       |
| NH <sub>2</sub> -MIL-100(Fe)                                 | 32.14                         | 7   | 20               | [9]       |
| Fe <sub>3</sub> O <sub>4</sub> @MgAl-LDH@La(OH) <sub>3</sub> | 66.5                          | 7   | 25               | [10]      |
| UiO-66-NH <sub>2</sub>                                       | 50.5                          | 5.5 | 40               | [11]      |
| MOF-808(Zr/Ce)                                               | 54.9                          | 5.1 | 25               | This work |

## Reference

- [1] C. Pinyorosphatum, P. Rattanarat, S. Chaiyo, W. Siangproh, and O. Chailapakul, Colorimetric sensor for determination of phosphate ions using anti-aggregation of 2-mercaptoethanesulfonate-modified silver nanoplates and europium ions, *Sensor. Actuat. B-Chem.*, 2019, **290**, 226-232.
- [2] C. Gong, Z. Li, G. Liu, and S. Pu, Ratiometric fluorescent sensing for phosphate based on Eu/Ce/UiO-66-(COOH)<sub>2</sub> nanoprobe, *Spectrochim. Acta A*, 2021, **252**, 119493.
- [3] J. Qin, D. Li, Y. Miao, and G. Yan, Detection of phosphate based on phosphorescence of Mn doped ZnS quantum dots combined with cerium(iii), *RSC Adv.*, 2017, **7**, 46657-46664.
- [4] A .A. Fadhel, M. Johnson, K. Trieu, E. Koculi, and A. D. Campiglia, Selective nano-sensing approach for the determination of inorganic phosphate in human urine samples, *Talanta*, 2017, **164**, 209-215.
- [5] S. Cinti, D. Talarico, G. Palleschi, D. Moscone, F. Arduini, Novel reagentless paper-based screen-printed electrochemical sensor to detect phosphate, *Anal. Chim. Acta*, 2016, **919**, 78-84.
- [6] X. Li, X. Niu, P. Liu, X. Xu, D. Du, and Y. Lin, High-performance dual-channel ratiometric colorimetric sensing of phosphate ion based on target-induced differential oxidase-like activity changes of Ce-Zr bimetal-organic frameworks, *Sensor. Actuat. B-Chem.*, 2020, **321**, 128546.
- [7] T. Han, X. Lu, Y. Sun, J. Jiang, W. Yang, and P. G. Jonsson, Magnetic bio-activated carbon production from lignin via a streamlined process and its use in phosphate removal from aqueous solutions, *Sci. Total Environ.*, 2020, **708**, 135069.
- [8] L. Wang, J. Wang, C. He, W. Lyu, W. Zhang, W. Yan, and L. Yang, Development of rare earth element doped magnetic biochars with enhanced phosphate adsorption performance, *Colloid. Surface. A*, 2019, **561**, 236-243.
- [9] Q. Xie, Y. Li, Z. Lv, H. Zhou, X. Yang, J. Chen, and H. Guo, Effective Adsorption and Removal of Phosphate from Aqueous Solutions and Eutrophic Water by Fe-based MOFs of MIL-101, *Sci. Rep.*, 2017, **7**, 3316.

- [10] Z. Lin, and J. Chen, Magnetic  $\text{Fe}_3\text{O}_4@\text{MgAl-LDH}@\text{La}(\text{OH})_3$  composites with a hierarchical core-shell structure for phosphate removal from wastewater and inhibition of labile sedimentary phosphorus release, *Chemosphere*, 2021, **264**, 128551.
- [11] X. Zhang, M. Liu, and R. Han, Adsorption of phosphate on UiO-66- $\text{NH}_2$  prepared by a green synthesis method, *J. Environ. Chem. Eng.*, 2021, **9**, 106672.
